# Supplementary material
Source: Royal Society of Chemistry journal article supplement (doi:10.1039/d6ta03312a)
Supplement: d6ta03312a1.pdf [file d6ta03312a1.pdf]

## Supplementary Information

### Direct Room-Temperature Synthesis of LDH Thin Films via Non-Thermal Plasma

Ying Wang<sup>1,2 †</sup>, Shaotang Li<sup>1,2 †</sup>, Zongquan Liu<sup>1,2</sup>, Xinchun Tian<sup>1,2,3,\*</sup>, Zhuang Ma<sup>1,2,3,4</sup>

<sup>1</sup> School of Materials Science and Engineering, Beijing Institute of Technology, Beijing, 100081, China

<sup>2</sup> Tangshan Research Institute, Beijing Institute of Technology, Tangshan 063000, China

<sup>3</sup> National Key Laboratory of Science and Technology on Material under Shock and Impact, Beijing 100081, China

<sup>4</sup> Beijing Institute of Technology Chongqing Innovation Center, Chongqing, 401120, China

\*Corresponding author: xctian@bit.edu.cn

**Table S1. Analytical Eco-scale for the LDH thin films synthesis method via O<sub>2</sub> non-thermal plasma (NTP) processing of sol–gel precursors.**

| Parameter                                        | Details                                                                                                  | Penalty Points  |
|--------------------------------------------------|----------------------------------------------------------------------------------------------------------|-----------------|
| <b>Reagent hazard penalty</b>                    |                                                                                                          |                 |
| Propionic acid                                   | GHS: Danger, Corrosion (2) + Exclamation mark (1) → 2 hazard pictograms × 2                              | 4               |
| Ethanolamine                                     | GHS: Danger, Corrosion (2) + Health hazard (2) → 2 hazard pictograms × 2                                 | 4               |
| Nickel(II) acetate tetrahydrate                  | GHS: Danger, Health hazard (2) + Environmental hazard (2) + Acute toxicity (2) → 3 hazard pictograms × 2 | 6               |
| <b>Reagent Amount penalty</b>                    |                                                                                                          |                 |
| Propionic acid (0.5 mL)                          | <10 mL                                                                                                   | 1               |
| Ethanolamine (0.5 mL)                            | <10 mL                                                                                                   | 1               |
| Nickel(II) acetate tetrahydrate (0.5 mL)         | <10 mL                                                                                                   | 1               |
| <b>Energy consumption</b>                        |                                                                                                          |                 |
| NTP treatment (750 W × 9 h = 6.75 kWh)           | >0.1 kWh per sample                                                                                      | 1               |
| <b>Occupational hazard</b>                       |                                                                                                          |                 |
| Closed plasma chamber                            | No open handling                                                                                         | 0               |
| <b>Waste penalty</b>                             |                                                                                                          |                 |
| Liquid waste (~0.1 mL per substrate)             | <1 mL                                                                                                    | 1               |
| <b>Waste treatment penalty</b>                   |                                                                                                          |                 |
| Safe disposal (professional treatment/recycling) | Effective treatment → 0 points                                                                           | 0               |
| <b>Total penalty points</b>                      |                                                                                                          | <b>19</b>       |
| <b>Eco-Scale Score</b>                           |                                                                                                          | <b>100 - 19</b> |
|                                                  |                                                                                                          | <b>81</b>       |

Note: The Eco-Scale assessment was performed following the related protocols.<sup>1-3</sup>

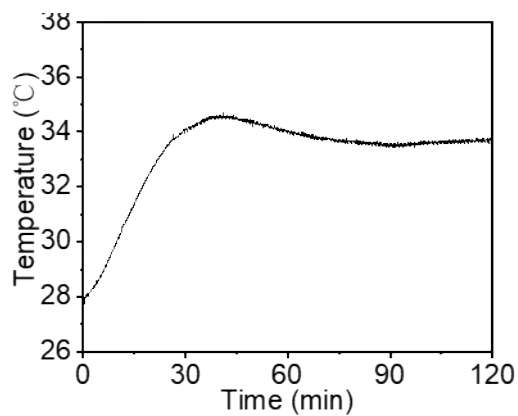

**Figure S1.** The temperature of the sample during NTP treatment.

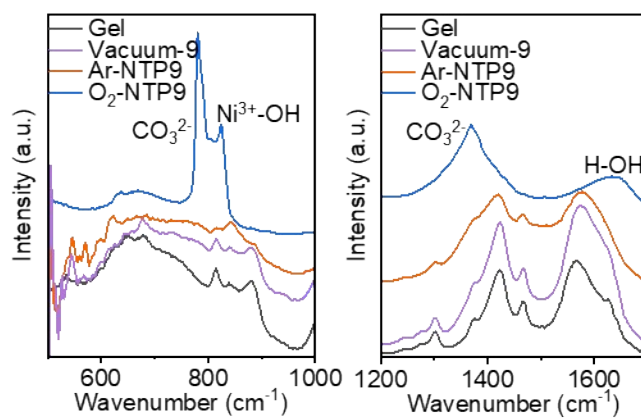

**Figure S2.** FTIR spectra of the as-deposited gel film, Vacuum-9 , Ar-NTP9, and O<sub>2</sub>-NTP9 samples.

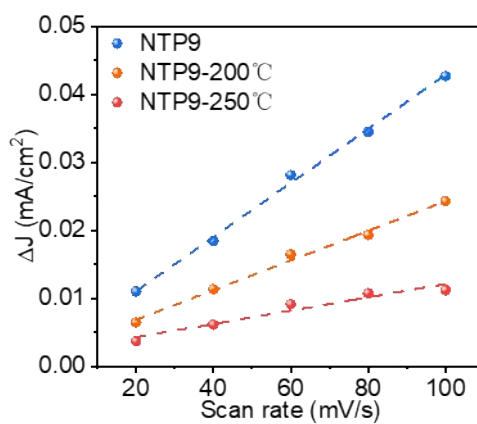

**Figure S3.** Linear fitting of the capacitive current density difference  $(j_a - j_c)/2$  as a function of scan rate for NTP9, NTP9-200, and NTP9-250 electrodes in a non-Faradaic potential region.

### References:

1. A. H. Almalki, I. A. Naguib, F. S. Alshehri, B. S. Alghamdi, H. O. Alsaab, Y. S. Althobaiti, S. Alshehri and F. F. Abdallah, *Molecules*, 2021, 26, 5436.
2. A. Gałuszka, P. Konieczka, Z. M. Migaszewski and J. Namieśnik, *TrAC, Trends Anal. Chem.*, 2012, **37**, 61–72.
3. L. Halka, T. Kucher, M. Piponski, L. Kryskiw, N. Zarivna, M. Horyn, N. Horlachuk, K. Duve and L. Logoyda, *BMC Chem.*, 2024, **18**, 209.
